# Supplementary material for: Facile preparation of 1,3,5,7-tetranitro-1,3,5,7-tetrazocane/glycidylazide polymer energetic nanocomposites with enhanced thermolysis activity and low impact sensitivity
Source: Royal Society of Chemistry journal article supplement (doi:10.1039/c6ra27780b), 2017-01-01
Supplement: c6ra27780b1.pdf [file c6ra27780b1.pdf]

## Supporting Information

Facile preparation of 1, 3, 5, 7-tetranitro-1, 3, 5, 7-tetrazocane/Glycidylazide polymer energetic nanocomposites with enhanced thermolysis activity and low impact sensitivity

Teng Chen<sup>a</sup>, Wei Jiang<sup>a\*</sup>, Ping Du<sup>b\*</sup>, Jie Liu<sup>a</sup>, Gazi Hao<sup>a</sup>, Han Gao<sup>a</sup>, Lei Xiao<sup>a</sup>, Xiang Ke<sup>a</sup>

<sup>a</sup> National Special Superfine Powder Engineering Research Center, Nanjing University of Science and Technology, Nanjing 210094, P.R. China

<sup>b</sup> Nanjing University of Science and Technology, Nanjing 210094, P.R. China

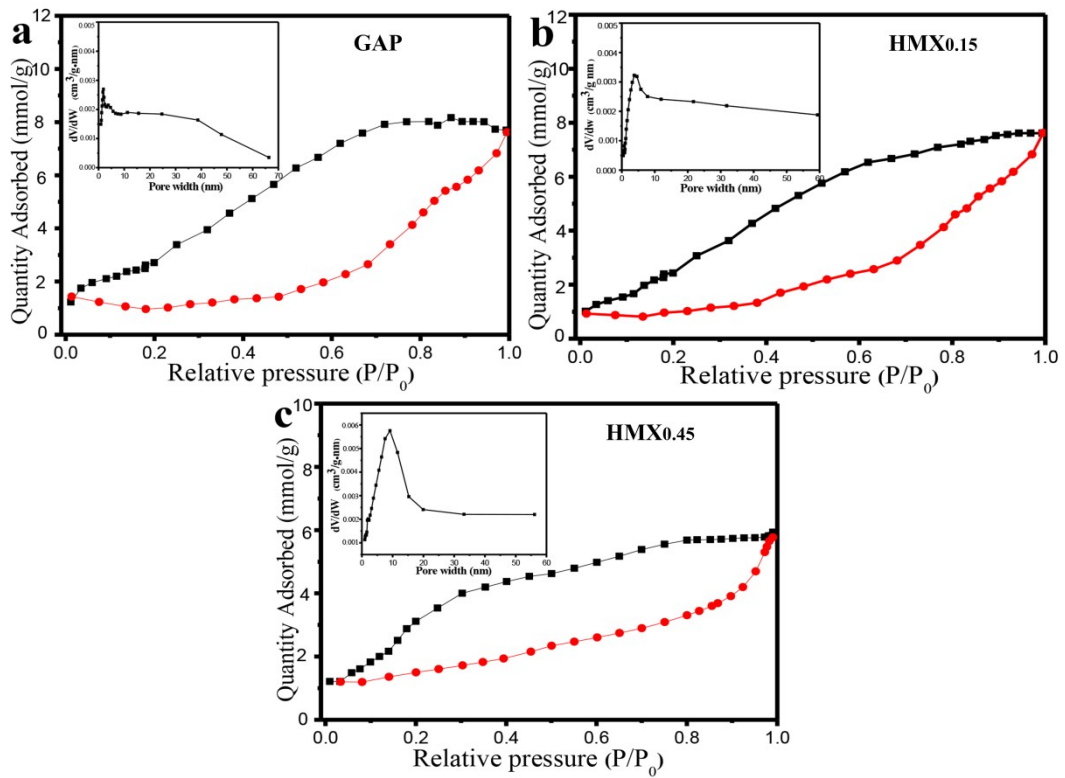

Fig. S1. Nitrogen adsorption-desorption isotherm of GAP aerogel (a), HMX<sub>0.15</sub> (b) and HMX<sub>0.45</sub> (c).

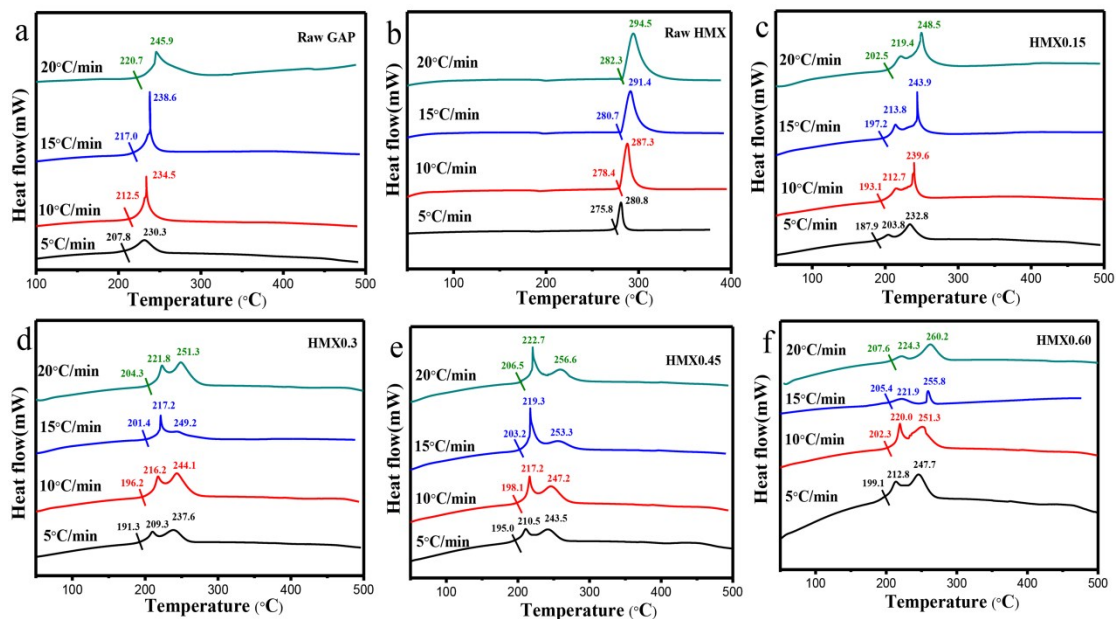

Fig. S2. DTA curves of raw GAP (a), raw HMX (b), HMX<sub>0.15</sub> (c), HMX<sub>0.30</sub> (d), HMX<sub>0.45</sub> (e) and HMX<sub>0.60</sub> (f) at different heating rates.

Tab. S1 The calculated values of  $H_{50}$  for different samples

| Sample        | HMX <sub>0.15</sub> | HMX <sub>0.30</sub> | HMX <sub>0.45</sub> | HMX <sub>0.60</sub> | HMX  |
|---------------|---------------------|---------------------|---------------------|---------------------|------|
| $H_{50}$ (cm) | 30.1                | 28.5                | 26.2                | 23.8                | 19.6 |
